# Supplementary material
Source: PubMed Central journal article supplement (PMC3354920)
Supplement: NIHMS371922-supplement-Supplement1.pdf [file NIHMS371922-supplement-Supplement1.pdf]

**Supplemental Table 1:** Characteristics of AMA Positive and AMA Negative PBC Patients

|                                     | <b>AMA+</b><br>(n=303) | <b>AMA-</b><br>(n=44) | <b>p-value</b> |
|-------------------------------------|------------------------|-----------------------|----------------|
| <b>Male: Female Ratio</b>           | 25:278                 | 1:43                  | 0.225          |
| <b>Age (years)*</b>                 | 60.8 (35-85)           | 58.1 (35-76)          | 0.110          |
| <b>Age at Diagnosis (years)*</b>    | 51.0 (29-77)           | 50.2 (33-72)          | 0.584          |
| <b>Disease Duration (years)*</b>    | 9.8 (0-31)             | 7.9 (0-30)            | 0.110          |
| <b>Alkaline Phosphatase (UI/l)†</b> | 171.4 +/- 101.9        | 163.8 +/- 102.7       | 0.644          |
| <b>ALT (UI/l)†</b>                  | 52.4 +/- 41.8          | 44.5 +/- 30.1         | 0.225          |
| <b>UDCA Therapy</b>                 | 86.7%                  | 84.1%                 | 0.640          |
| <b>OLT</b>                          | 8.3%                   | 6.8%                  | 1.000          |

\* Values presented as Mean (Range). † Values presented as Mean +/- Standard deviation
