# Supplementary material
Source: PubMed Central journal article supplement (PMC3354920)
Supplement: NIHMS371922-supplement-Supplement2.pdf [file NIHMS371922-supplement-Supplement2.pdf]

**Supplemental Table 2: Genetic analysis of PBC patients with prior OLT compared with sub-set of non-OLT patients 65 years old or greater at time of study.**

a. SNPs data

|                    | <b>PBC (OLT)</b><br><i>n=29</i><br>Count (freq) | <b>PBC (non-OLT) 65+</b><br><i>n=109</i><br>Count (freq) | <b>model</b>   | <b>OLT vs. Non-OLT 65+</b><br>OR (95% CI) | p-value |
|--------------------|-------------------------------------------------|----------------------------------------------------------|----------------|-------------------------------------------|---------|
| <b>CTLA4 49AG</b>  |                                                 |                                                          |                |                                           |         |
| AA                 | 8 (0.28)                                        | 46 (0.42)                                                | Log-additive   | 2.23 (1.11-4.45)                          | 0.02    |
| AG                 | 12 (0.41)                                       | 47 (0.43)                                                | Dominant       | 2.57 (0.87-7.55)                          | 0.09    |
| GG                 | 9 (0.31)                                        | 16 (0.15)                                                | Recessive (GG) | 3.48 (1.09-11.06)                         | 0.03    |
| <b>CTLA4 CT60</b>  |                                                 |                                                          |                |                                           |         |
| GG                 | 15 (0.52)                                       | 30 (0.28)                                                | Log-additive   | 0.42 (0.19-0.90)                          | 0.03    |
| AG                 | 13 (0.45)                                       | 53 (0.49)                                                | Dominant       | 0.40 (0.15-1.08)                          | 0.07    |
| AA                 | 1 (0.03)                                        | 26 (0.24)                                                | Recessive (AA) | 0.17 (0.02-1.35)                          | 0.09    |
| <b>PDCD1 PD1.3</b> |                                                 |                                                          |                |                                           |         |
| GG                 | 22 (0.76)                                       | 84 (0.77)                                                | Log-additive   | 1.57 (0.59-4.16)                          | 0.37    |
| AG                 | 5 (0.17)                                        | 24 (0.22)                                                | Dominant       | 1.52 (0.48-4.79)                          | 0.47    |
| AA                 | 2 (0.07)                                        | 1 (0.01)                                                 | Recessive (AA) | 4.25 (0.19-94.15)                         | 0.36    |

b. CTLA4 Haplotype data

| <b>CTLA4</b>          | <b>PBC (OLT)</b><br><i>n=29</i><br>Freq. | <b>PBC (non-OLT) 65+</b><br><i>n=109</i><br>Freq. | p-value |
|-----------------------|------------------------------------------|---------------------------------------------------|---------|
| <b>49AG:CT60</b>      |                                          |                                                   |         |
| A:A                   | 0.2586                                   | 0.4817                                            | 0.021   |
| A:G                   | 0.2241                                   | 0.1560                                            | 0.821   |
| G:G                   | 0.5172                                   | 0.3624                                            | 0.021   |
| <b>Global p-value</b> |                                          | 0.045                                             |         |
